# Supplementary material for: The impact of board diversity and sustainability engagement on bank performance
Source: Springer Nature journal article supplement (doi:10.1007/s10997-026-09778-y), 2026-02-21
Supplement: MOESM1 [file 10997_2026_9778_MOESM1_ESM.docx]

**Appendix - Focus on European banks**

In the following section, we run our models considering banks located in geographical Europe only in order to check for robustness of our findings. Our results are almost entirely confirmed. The only difference refer to the following aspects:

- Liquidity risk has a negative impact on ROA when the relationship is investigated in the total sample, while the opposite occurs in Europe: the liquidity risk has a positive impact on ROA. Such difference can be probably attributed to EU regulations: Under Basel III as implemented in Europe through the Capital Requirements Regulation (CRR) and Capital Requirements Directive (CRD), both the Liquidity Coverage Ratio and Net Stable Funding Ratio are compulsory for almost all banks In US the applicability of Basel III depends on the size and complexity of the financial institutions, therefore results are affected by the bigger size of banks included in our sample.

- In Europe environmental investments (E pillar score) have a positive impact on Tobin Q and Z-SCORE, while no significant impact is detected on the total sample; again such difference is probably connected to stronger EU attention and regulations on climate change.

- Diversity in time on board (tenure) has a positive impact on Tobin Q for the entire sample, while for the EU is negative. We do not have a definite explanation for this outcome. One possible explanation is that EU mechanisms that enhance market valuation (like tenure diversity) might be less effective, or even counterproductive if they clash with local expectations of cohesiveness and harmony, as it typically applies in Northern and Central EU countries.

**Table A.1 - Geographical distribution of the European sub-sample**

| **COUNTRY** | **Freq.** | **Percent %** | **Cum.  %** |
| --- | --- | --- | --- |
| Denmark | 985 | 5.62 | 5.62 |
| Finland | 837 | 4.78 | 10.4 |
| France | 1,914 | 10.93 | 21.33 |
| Germany | 2,235 | 12.76 | 34.09 |
| Greece | 845 | 4.82 | 38.91 |
| Italy | 3,069 | 17.52 | 56.43 |
| Poland | 1,456 | 8.31 | 64.75 |
| Spain | 1,915 | 10.93 | 75.68 |
| Sweden | 601 | 3.43 | 79.11 |
| UK | 3,659 | 20.89 | 100 |
|  |  |  |  |
| Total | 17,516 | 100 |  |

**Note:** The EU sub-sample represents about 48% of total observations

**Table A.2 - Descriptive statistics for European sub-sample**

| **Variable** | **Obs** | **Mean** | **Std. Dev.** | **Min** | **Max** |
| --- | --- | --- | --- | --- | --- |
| ROA | 17,516 | 0.52 | 1.31 | -10.99 | 8.36 |
| TOBIIN Q | 12,135 | 0.35 | 0.15 | 0.03 | 2.62 |
| Z-SCORE | 15,565 | 0.27 | 0.21 | 0.00 | 1.74 |
| AGE | 15,558 | 7.99 | 2.23 | 0.71 | 16.85 |
| NATMIX | 14,989 | 0.31 | 0.27 | 0.00 | 0.90 |
| GENDER | 17,516 | 0.07 | 0.02 | 0.00 | 0.18 |
| NQUAL | 15,558 | 1.08 | 0.39 | 0.00 | 2.50 |
| TIMEBRD | 15,558 | 4.23 | 2.35 | 0.00 | 13.50 |
| BD | 14,982 | 0.00 | 1.12 | -3.65 | 3.66 |
| E | 10,809 | 73.54 | 25.32 | 0.03 | 97.47 |
| S | 10,809 | 65.14 | 20.52 | 6.09 | 97.58 |
| G | 10,809 | 67.46 | 22.01 | 1.88 | 97.37 |
| ESG | 10,809 | 66.11 | 18.82 | 4.43 | 94.25 |
| ESG CONTR | 10,402 | 66.40 | 38.09 | 0.50 | 100.00 |
| SIZE | 15,565 | 18.79 | 1.98 | 11.25 | 21.65 |
| BOARD SIZE | 15,564 | 16.22 | 4.41 | 7.00 | 24.00 |
| CAP RATIO | 17,516 | 6.83 | 4.97 | 0.00 | 36.25 |
| CREDIT RISK | 15,216 | 0.01 | 0.02 | -0.48 | 0.17 |
| LIQUIDITY RISK | 15,235 | 7.65 | 6.92 | 1.35 | 114.45 |

**Table A.3 – GMM analysis for the impacts on ROA for European sub-sample**

| Model | (1) | (2) | (3) | (4) | (5) | (6) | (7) |
| --- | --- | --- | --- | --- | --- | --- | --- |
|  | **ROA** | **ROA** | **ROA** | **ROA** | **ROA** | **ROA** | **ROA** |
| AGE | -0.0412*** |  |  |  |  |  |  |
|  | (0.006) |  |  |  |  |  |  |
| NATMIX | -0.4182*** |  |  |  |  |  |  |
|  | (0.065) |  |  |  |  |  |  |
| GENDER | -0.6679* |  |  |  |  |  |  |
|  | (0.387) |  |  |  |  |  |  |
| NQUAL | 0.0034 |  |  |  |  |  |  |
|  | (0.033) |  |  |  |  |  |  |
| TIMEBRD | 0.0127* |  |  |  |  |  |  |
|  | (0.007) |  |  |  |  |  |  |
| BOARD SIZE | 0.0412*** | 0.0243*** | 0.0029 | 0.0040 | 0.0024 | 0.0041 | 0.0010 |
|  | (0.004) | (0.004) | (0.003) | (0.003) | (0.003) | (0.003) | (0.003) |
| SIZE | 0.3407*** | 0.3371*** | 0.3278*** | 0.2540*** | 0.3626*** | 0.3837*** | 0.2824*** |
|  | (0.031) | (0.030) | (0.028) | (0.028) | (0.029) | (0.028) | (0.029) |
| CAP RATIO | 0.2257*** | 0.2195*** | 0.2159*** | 0.2055*** | 0.2140*** | 0.2135*** | 0.2072*** |
|  | (0.005) | (0.005) | (0.004) | (0.004) | (0.004) | (0.004) | (0.004) |
| CREDIT RISK | -0.1982*** | -0.1988*** | -0.4562*** | -0.4371*** | -0.4574*** | -0.4687*** | -0.4615*** |
|  | (0.005) | (0.005) | (0.009) | (0.009) | (0.009) | (0.009) | (0.009) |
| LIQUIDITY RISK | 0.0141*** | 0.0143*** | 0.0009 | 0.0029 | 0.0027 | 0.0041** | 0.0038* |
|  | (0.002) | (0.002) | (0.002) | (0.002) | (0.002) | (0.002) | (0.002) |
| BD |  | 0.0054 |  | 0.0071 | 0.0210* | 0.3578*** | 0.2025*** |
|  |  | (0.013) |  | (0.012) | (0.012) | (0.034) | (0.021) |
| E |  |  | -0.0004 | -0.0015** |  |  |  |
|  |  |  | (0.001) | (0.001) |  |  |  |
| S |  |  | -0.0056*** | -0.0065*** |  |  |  |
|  |  |  | (0.001) | (0.001) |  |  |  |
| G |  |  | -0.0080*** |  |  |  |  |
|  |  |  | (0.001) |  |  |  |  |
| ESG |  |  |  |  | -0.0163*** | -0.0145*** |  |
|  |  |  |  |  | (0.001) | (0.001) |  |
| ESG CONTR |  |  |  |  | 0.0008** |  | -0.0009*** |
|  |  |  |  |  | (0.000) |  | (0.000) |
| ESG*BD |  |  |  |  |  | 0.0057*** |  |
|  |  |  |  |  |  | (0.000) |  |
| ESG CONTR*BD |  |  |  |  |  |  | -0.0030*** |
|  |  |  |  |  |  |  | (0.000) |
| Observations | 14304 | 14320 | 10439 | 10293 | 9947 | 10293 | 9947 |
| F-stat | 541 | 881 | 843 | 798 | 834 | 858 | 800 |
| Kleib-Paap rk LM | 33 | 14 | 19 | 18 | 19 | 24 | 17 |
| Kleib-Paap rk WaldF | 366 | 735 | 241 | 326 | 187 | 203 | 414 |

**Table A.4 – GMM analysis for the impacts on TOBIN Q for European sub-sample**

| Model | (1) | (2) | (3) | (4) | (5) | (6) | (7) |
| --- | --- | --- | --- | --- | --- | --- | --- |
|  | **TOBIN Q** | **TOBIN Q** | **TOBIN Q** | **TOBIN Q** | **TOBIN Q** | **TOBIN Q** | **TOBIN Q** |
| AGE | 0.0007 |  |  |  |  |  |  |
|  | (0.001) |  |  |  |  |  |  |
| NATMIX | 0.0485*** |  |  |  |  |  |  |
|  | (0.006) |  |  |  |  |  |  |
| GENDER | -0.3305*** |  |  |  |  |  |  |
|  | (0.031) |  |  |  |  |  |  |
| NQUAL | -0.0593*** |  |  |  |  |  |  |
|  | (0.003) |  |  |  |  |  |  |
| TIMEBRD | -0.0011* |  |  |  |  |  |  |
|  | (0.001) |  |  |  |  |  |  |
| BOARD SIZE | 0.0003 | 0.0004 | 0.0001 | 0.0001 | -0.0001 | 0.0000 | -0.0002 |
|  | (0.000) | (0.000) | (0.000) | (0.000) | (0.000) | (0.000) | (0.000) |
| SIZE | -0.0033 | -0.0003 | -0.0076** | -0.0057* | -0.0079** | -0.0192*** | -0.0122*** |
|  | (0.003) | (0.003) | (0.003) | (0.003) | (0.003) | (0.003) | (0.003) |
| CAP RATIO | 0.0000 | 0.0010** | 0.0016*** | 0.0020*** | 0.0015*** | 0.0016*** | 0.0023*** |
|  | (0.000) | (0.000) | (0.000) | (0.000) | (0.000) | (0.000) | (0.000) |
| CREDIT RISK | -0.0093*** | -0.0085*** | -0.0046*** | -0.0061*** | -0.0059*** | -0.0009 | -0.0011 |
|  | (0.001) | (0.001) | (0.001) | (0.001) | (0.001) | (0.001) | (0.001) |
| LIQUIDITY RISK | -0.0008*** | -0.0009*** | -0.0025*** | -0.0026*** | -0.0024*** | -0.0030*** | -0.0026*** |
|  | (0.000) | (0.000) | (0.000) | (0.000) | (0.000) | (0.000) | (0.000) |
| BD |  | 0.0035*** |  | 0.0009 | -0.0003 | 0.0871*** | 0.0523*** |
|  |  | (0.001) |  | (0.001) | (0.001) | (0.004) | (0.002) |
| E |  |  | 0.0001* | 0.0003*** |  |  |  |
|  |  |  | (0.000) | (0.000) |  |  |  |
| S |  |  | 0.0003*** | 0.0003*** |  |  |  |
|  |  |  | (0.000) | (0.000) |  |  |  |
| G |  |  | 0.0003*** |  |  |  |  |
|  |  |  | (0.000) |  |  |  |  |
| ESG |  |  |  |  | 0.0008*** | 0.0006*** |  |
|  |  |  |  |  | (0.000) | (0.000) |  |
| ESG CONTR |  |  |  |  | -0.0003*** |  | 0.0000 |
|  |  |  |  |  | (0.000) |  | (0.000) |
| ESG*BD |  |  |  |  |  | 0.0013*** |  |
|  |  |  |  |  |  | (0.000) |  |
| ESG CONTR*BD |  |  |  |  |  |  | 0.0008*** |
|  |  |  |  |  |  |  | (0.000) |
| Observations | 10838 | 10849 | 9923 | 9777 | 9715 | 9777 | 9715 |
| F-stat | 88 | 25 | 37 | 33 | 46 | 122 | 32 |
| Kleib-Paap rk LM | 26 | 10 | 16 | 16 | 17 | 24 | 17 |
| Kleib-Paap rk WaldF | 500 | 442 | 190 | 231 | 291 | 203 | 561 |

**Table A. 5 – GMM analysis for the impacts on Z-SCORE for European sub-sample**

| Model | (1) | (2) | (3) | (4) | (5) | (6) | (7) |
| --- | --- | --- | --- | --- | --- | --- | --- |
|  | **Z-SCORE** | **Z-SCORE** | **Z-SCORE** | **Z-SCORE** | **Z-SCORE** | **Z-SCORE** | **Z-SCORE** |
| AGE | 0.0003 |  |  |  |  |  |  |
|  | (0.000) |  |  |  |  |  |  |
| NATMIX | -0.0304*** |  |  |  |  |  |  |
|  | (0.003) |  |  |  |  |  |  |
| GENDER | -0.1867*** |  |  |  |  |  |  |
|  | (0.017) |  |  |  |  |  |  |
| NQUAL | -0.0026* |  |  |  |  |  |  |
|  | (0.001) |  |  |  |  |  |  |
| TIMEBRD | 0.0022*** |  |  |  |  |  |  |
|  | (0.000) |  |  |  |  |  |  |
| BOARD SIZE | 0.0012*** | 0.0014*** | 0.0015*** | 0.0012*** | 0.0009*** | 0.0009*** | 0.0008*** |
|  | (0.000) | (0.000) | (0.000) | (0.000) | (0.000) | (0.000) | (0.000) |
| SIZE | -0.0242*** | -0.0243*** | -0.0238*** | -0.0283*** | -0.0276*** | -0.0235*** | -0.0334*** |
|  | (0.001) | (0.001) | (0.002) | (0.002) | (0.002) | (0.002) | (0.002) |
| CAP RATIO | 0.0155*** | 0.0153*** | 0.0154*** | 0.0154*** | 0.0156*** | 0.0160*** | 0.0154*** |
|  | (0.000) | (0.000) | (0.000) | (0.000) | (0.000) | (0.000) | (0.000) |
| CREDIT RISK | -0.0037*** | -0.0036*** | -0.0174*** | -0.0170*** | -0.0188*** | -0.0170*** | -0.0175*** |
|  | (0.000) | (0.000) | (0.001) | (0.001) | (0.001) | (0.001) | (0.001) |
| LIQUIDITY RISK | -0.0009*** | -0.0009*** | -0.0008*** | -0.0010*** | -0.0008*** | -0.0010*** | -0.0008*** |
|  | (0.000) | (0.000) | (0.000) | (0.000) | (0.000) | (0.000) | (0.000) |
| BD |  | 0.0087*** |  | 0.0080*** | 0.0078*** | 0.0112*** | 0.0015 |
|  |  | (0.001) |  | (0.001) | (0.001) | (0.002) | (0.001) |
| E |  |  | 0.0003*** | 0.0002*** |  |  |  |
|  |  |  | (0.000) | (0.000) |  |  |  |
| S |  |  | -0.0006*** | -0.0006*** |  |  |  |
|  |  |  | (0.000) | (0.000) |  |  |  |
| G |  |  | -0.0002*** |  |  |  |  |
|  |  |  | (0.000) |  |  |  |  |
| ESG |  |  |  |  | -0.0006*** | -0.0007*** |  |
|  |  |  |  |  | (0.000) | (0.000) |  |
| ESG CONTR |  |  |  |  | -0.0003*** |  | -0.0003*** |
|  |  |  |  |  | (0.000) |  | (0.000) |
| ESG*BD |  |  |  |  |  | -0.0000 |  |
|  |  |  |  |  |  | (0.000) |  |
| ESG CONTR*BD |  |  |  |  |  |  | 0.0001*** |
|  |  |  |  |  |  |  | (0.000) |
| Observations | 14304 | 14320 | 10439 | 10293 | 9947 | 10293 | 9947 |
| F-stat | 794 | 1297 | 871 | 869 | 906 | 858 | 880 |
| Kleib-Paap rk LM | 33 | 14 | 19 | 18 | 19 | 24 | 17 |
| Kleib-Paap rk WaldF | 366 | 735 | 241 | 326 | 187 | 203 | 414 |
